# Supplementary material
Source: publisher figshare collection journal article supplement (https://osapublishing.figshare.com/ndownloader/files/28357656)
Supplement: Supplementary file 1 [file 28357656]

## X-ray source translation based computed tomography (STCT): supplement

HAIJUN YU,<sup>1,2</sup> LEI LI,<sup>2,3</sup> CHUANDONG TAN,<sup>2,3</sup> FENGLIN LIU,<sup>1,2,3,4</sup>  AND RIFENG ZHOU<sup>1,2,3,5</sup>

<sup>1</sup>Key Lab of Optoelectronic Technology and Systems, Ministry of Education, Chongqing University, Chongqing 400044, China

<sup>2</sup>Engineering Research Center of Industrial Computed Tomography Nondestructive Testing, Ministry of Education, Chongqing University, Chongqing 400044, China

<sup>3</sup>State Key Laboratory of Mechanical Transmission, Chongqing University, Chongqing 400044, China

<sup>4</sup>liufl@cqu.edu.cn

<sup>5</sup>zhou65112401@cqu.edu.cn

---

This supplement published with The Optical Society on 9 June 2021 by The Authors under the terms of the [Creative Commons Attribution 4.0 License](https://creativecommons.org/licenses/by/4.0/) in the format provided by the authors and unedited. Further distribution of this work must maintain attribution to the author(s) and the published article's title, journal citation, and DOI.

Supplement DOI: <https://doi.org/10.6084/m9.figshare.14748828>

Parent Article DOI: <https://doi.org/10.1364/OE.427659>

# X-ray Source Translation Based Computed Tomography (STCT): supplemental document

## S1. Analysis of maximum translation distance of source

Firstly, we consider a line that goes through the points  $(a, b)$ . The distance from this line to the center of coordinates is  $r$ . we can formulate an equation of this line as

$$\begin{aligned} y - b &= k(x - a) \\ \Rightarrow kx - y + b - ka &= 0 \end{aligned} \quad (S1)$$

where  $k$  is the slope of this line. According to the formula for the distance between the line and a point, we have

$$\frac{|b - ka|}{\sqrt{k^2 + 1}} = r. \quad (S2)$$

Substituting (S1) into (S2), we can obtain that

$$1) \text{ In the case of } a = r, k = \frac{b^2 - r^2}{2br};$$

$$2) \text{ In the case of } a \neq r \text{ and } a^2 + b^2 \geq r^2, k = \frac{ab \pm \sqrt{r^2(a^2 + b^2 - r^2)}}{a^2 - r^2}.$$

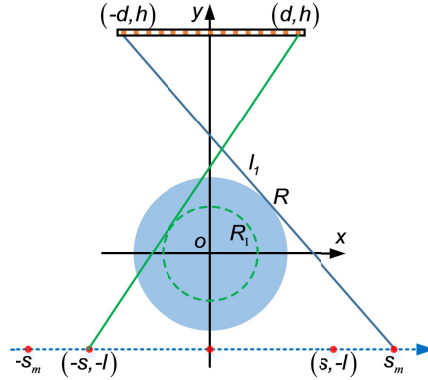

Fig. S1. The diagram of the maximum translation distance of the X-ray source.

For a detected object with radius  $R$ , the maximum translation range of the X-ray source is  $[-s_m, s_m]$ , as illustrated in Fig. S1.  $s_m$  can be calculated by finding the intersection point of the source trajectory and the line  $l_1$  which is passing through point  $(-d, h)$  and tangent to the circle  $x^2 + y^2 = R^2$ . This can be easily calculated based on the aforementioned discussion. Because the detector size is much bigger than the detected object (i.e.  $d > R$ ) in micro CT applications, substituting  $-d, h, R$  for  $a, b, r$  respectively, we can obtain the slope of  $l_1$  as

$$k_1 = \frac{-dh + \sqrt{R^2(d^2 + h^2 - R^2)}}{d^2 - R^2}, \quad (S3)$$

Taking (S3) and  $y = -l$  into (S1), we get

$$s_m = \frac{(d^2 - R^2)(l + h)}{dh - R\sqrt{h^2 + d^2 - R^2}} - d. \quad (S4)$$

## S2. Analysis of the number of translations in mSTCT

Because the angular coverage of projections from one STCT is independent of  $r$  in the case of  $|r| \leq R_1$ , the interval angle  $\Delta\theta$  is set as  $2\arctan(d/h)$  to minimize data redundancy between two adjacent STCTs. Firstly, we mainly consider the angular coverage for  $R_1$ . As exhibited in Fig. S2, to guarantee the angular coverage over  $360^\circ$ , the number of translations  $T$  can be calculated as

$$T = \text{ceil}(\psi/\Delta\theta), \quad (\text{S5})$$

with  $\psi = \pi + \Delta\theta - 2\alpha$ .  $\alpha$  is the angle between  $x$ -axis and the line perpendicular to the line  $l_2$  as shown in Fig. S2. Since the line  $l_2$  is tangent to the circle centered at the origin with radius  $R_1$  while passing through the point  $(d, h)$ , its slope is

$$k_3 = \frac{dh + R_1\sqrt{d^2 + h^2 - R_1^2}}{d^2 - R_1^2}. \quad (\text{S6})$$

Therefore,  $\alpha$  has a positive value, which can be calculated as

$$\alpha = \arctan \frac{R_1^2 - d^2}{dh + R_1\sqrt{d^2 + h^2 - R_1^2}}. \quad (\text{S7})$$

Figure S2 displays the case of  $T = 4$ , each STCT has a translated angle  $\theta_t = \theta_1 + (t-1)\Delta\theta$ , with  $\theta_1 = 0$  and  $t = 1, \dots, T$ . From the distribution of projections from mSTCT, it is observed that the projection values  $\bar{p}(\varphi, r)$ ,  $\varphi \in [0, \pi]$  are available for all  $|r| < R_1$  if angular coverage over  $180^\circ$  for  $|r| = R_1$  is guaranteed. In practice, reconstructions without obvious artifacts can be obtained if  $T$  takes the nearest integer.

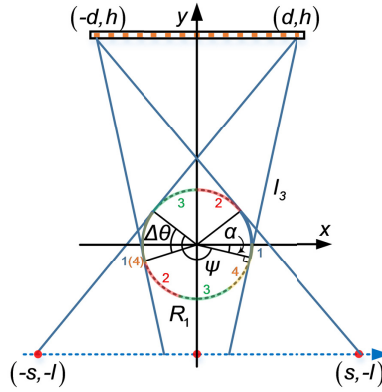

Fig. S2. The diagram of the number of translations in mSTCT. The arcs marked with 1, 2, 3, 4 represent the angular coverage for  $R_1$  by the 1<sup>st</sup>, 2<sup>nd</sup>, 3<sup>rd</sup>, 4<sup>th</sup> translations, respectively. 1(4) indicates the angular coverage of projections can be obtained from both 1<sup>st</sup> and 4<sup>th</sup> translations. The angle of each arc is equal to  $\Delta\theta$ .
